# Supplementary material for: Germline and somatic variations influence the somatic mutational signatures of esophageal squamous cell carcinomas in a Chinese population
Source: BMC Genomics. 2018 Jul 16;19:538. doi: 10.1186/s12864-018-4906-4 (PMC6048762; doi:10.1186/s12864-018-4906-4)
Supplement: Supplementary file 14 — Table S6. Summary of the clinical features of the 302 ESCC patients included in this study. (XLSX 26 kb) [file 12864_2018_4906_MOESM14_ESM.xlsx]

## Sheet: Sheet1
Table S6. Summary of the clinical features of the 302 ESCC patients included in this study.
SampleID	Age	Smoking	Drinking	Stage	survival(months)	Death/Survival	Location	Source	Accession number
214	65-70	No	No	IIA	63.3	S	Lower	European Genome-phenome Archive	EGAD00001001006
215	65-70	No	Yes	IIB	72.1	S	Middle	European Genome-phenome Archive	EGAD00001001006
216	60-65	Yes	Yes	IIIB	77.1	S	Lower	European Genome-phenome Archive	EGAD00001001006
217	40-45	Yes	Yes	IIIC	17.4	D	Middle	European Genome-phenome Archive	EGAD00001001006
218	45-50	No	No	IIB	76.4	S	Middle	European Genome-phenome Archive	EGAD00001001006
219	45-50	No	No	IIB	26.5	D	Middle	European Genome-phenome Archive	EGAD00001001006
220	35-40	No	No	IIA	76	S	Lower	European Genome-phenome Archive	EGAD00001001006
222	50-55	No	No	IIIA	21.2	D	Upper	European Genome-phenome Archive	EGAD00001001006
223	55-60	Yes	Yes	IIB	6.2	D	Upper	European Genome-phenome Archive	EGAD00001001006
224	50-55	Yes	Yes	IIIC	8.3	D	Middle	European Genome-phenome Archive	EGAD00001001006
225	50-55	Yes	Yes	IIB	8.5	D	Middle	European Genome-phenome Archive	EGAD00001001006
226	65-70	Yes	Yes	IIIA	24.8	D	Lower	European Genome-phenome Archive	EGAD00001001006
227	55-60	Yes	Yes	IIIC	10	D	Lower	European Genome-phenome Archive	EGAD00001001006
228	55-60	Yes	Yes	IIIA	42	D	Middle	European Genome-phenome Archive	EGAD00001001006
229	50-55	Yes	Yes	IIB	57.9	S	Middle	European Genome-phenome Archive	EGAD00001001006
381	70-75	No	No	IIB	72.5	S	Middle	European Genome-phenome Archive	EGAD00001001006
382	55-60	Yes	No	IIIA	22.7	D	Middle	European Genome-phenome Archive	EGAD00001001006
383	70-75	No	No	IIIA	32.2	D	Lower	European Genome-phenome Archive	EGAD00001001006
384	60-65	Yes	Yes	IIIB	37.2	D	Middle	European Genome-phenome Archive	EGAD00001001006
385	60-65	Yes	Yes	IIIC	38.5	D	Lower	European Genome-phenome Archive	EGAD00001001006
386	75-80	Yes	Yes	IIA	76.3	D	Lower	European Genome-phenome Archive	EGAD00001001006
387	60-65	No	Yes	IIB	75.9	S	Middle	European Genome-phenome Archive	EGAD00001001006
388	35-40	Yes	Yes	IIIA	6.3	D	Middle	European Genome-phenome Archive	EGAD00001001006
389	50-55	Yes	Yes	IIA	57.2	S	Lower	European Genome-phenome Archive	EGAD00001001006
390	50-55	Yes	Yes	IB	24.4	D	Lower	European Genome-phenome Archive	EGAD00001001006
391	65-70	Yes	Yes	IIIC	10.5	D	Middle	European Genome-phenome Archive	EGAD00001001006
392	60-65	Yes	No	IIIA	57.6	S	Middle	European Genome-phenome Archive	EGAD00001001006
393	60-65	Yes	No	IIIC	64.4	D	Lower	European Genome-phenome Archive	EGAD00001001006
394	65-70	No	No	IIA	5.1	D	Middle	European Genome-phenome Archive	EGAD00001001006
395	55-60	Yes	Yes	IIIA	62.5	S	Middle	European Genome-phenome Archive	EGAD00001001006
396	55-60	Yes	Yes	IIB	84.4	S	Middle	European Genome-phenome Archive	EGAD00001001006
397	50-55	Yes	No	IIIA	24.4	D	Middle	European Genome-phenome Archive	EGAD00001001006
398	50-55	Yes	No	IIB	65	S	Middle	European Genome-phenome Archive	EGAD00001001006
399	50-55	Yes	No	IIA	63	S	Middle	European Genome-phenome Archive	EGAD00001001006
400	65-70	No	No	IIIA	23.1	D	Middle	European Genome-phenome Archive	EGAD00001001006
401	65-70	Yes	Yes	IIB	9	D	Middle	European Genome-phenome Archive	EGAD00001001006
402	55-60	Yes	Yes	IIA	57.9	S	Lower	European Genome-phenome Archive	EGAD00001001006
403	65-70	Yes	Yes	IIB	31.5	D	Lower	European Genome-phenome Archive	EGAD00001001006
404	50-55	Yes	No	IIIA	57.1	S	Middle	European Genome-phenome Archive	EGAD00001001006
405	60-65	No	No	IIB	56.5	S	Middle	European Genome-phenome Archive	EGAD00001001006
406	60-65	Yes	Yes	IIIC	6.6	D	Middle	European Genome-phenome Archive	EGAD00001001006
407	55-60	Yes	Yes	IIB	48.8	D	Middle	European Genome-phenome Archive	EGAD00001001006
408	65-70	Yes	No	IIA	80.4	S	Lower	European Genome-phenome Archive	EGAD00001001006
409	55-60	Yes	Yes	IIA	79.2	S	Lower	European Genome-phenome Archive	EGAD00001001006
410	45-50	Yes	Yes	IIB	13.5	D	Middle	European Genome-phenome Archive	EGAD00001001006
411	50-55	Yes	Yes	IIIC	64.9	S	Lower	European Genome-phenome Archive	EGAD00001001006
412	60-65	Yes	Yes	IIIB	9.8	D	Lower	European Genome-phenome Archive	EGAD00001001006
413	70-75	Yes	Yes	IIA	3.8	D	Lower	European Genome-phenome Archive	EGAD00001001006
414	70-75	No	No	IB	0.6	D	Lower	European Genome-phenome Archive	EGAD00001001006
415	55-60	No	No	IIB	34.7	D	Middle	European Genome-phenome Archive	EGAD00001001006
416	50-55	Yes	Yes	IIIC	4.2	D	Lower	European Genome-phenome Archive	EGAD00001001006
417	55-60	No	No	IIA	60.5	S	Middle	European Genome-phenome Archive	EGAD00001001006
418	40-45	Yes	Yes	IB	66.5	S	Lower	European Genome-phenome Archive	EGAD00001001006
419	35-40	Yes	Yes	IIIC	15.6	D	Middle	European Genome-phenome Archive	EGAD00001001006
420	70-75	Yes	Yes	IIIC	13	D	Lower	European Genome-phenome Archive	EGAD00001001006
421	55-60	Yes	No	IIIC	64.7	S	Lower	European Genome-phenome Archive	EGAD00001001006
422	55-60	Yes	Yes	IIIC	64	S	Middle	European Genome-phenome Archive	EGAD00001001006
423	40-45	Yes	Yes	IIB	58.8	S	Upper	European Genome-phenome Archive	EGAD00001001006
424	50-55	Yes	Yes	IIA	64.7	S	Lower	European Genome-phenome Archive	EGAD00001001006
425	70-75	No	No	IIA	24.7	D	Lower	European Genome-phenome Archive	EGAD00001001006
426	55-60	Yes	Yes	IIB	62.5	S	Middle	European Genome-phenome Archive	EGAD00001001006
427	60-65	Yes	Yes	IIB	21.3	D	Middle	European Genome-phenome Archive	EGAD00001001006
428	60-65	Yes	Yes	IIIC	16.8	D	Lower	European Genome-phenome Archive	EGAD00001001006
429	65-70	No	No	IIIA	11	D	Middle	European Genome-phenome Archive	EGAD00001001006
430	45-50	Yes	Yes	IIIA	32.5	D	Lower	European Genome-phenome Archive	EGAD00001001006
431	45-50	No	No	IIIA	45.8	D	Middle	European Genome-phenome Archive	EGAD00001001006
432	40-45	Yes	No	IIIA	34.2	D	Upper	European Genome-phenome Archive	EGAD00001001006
433	55-60	No	No	IIB	23.3	D	Middle	European Genome-phenome Archive	EGAD00001001006
434	55-60	Yes	Yes	IIB	66.5	S	Upper	European Genome-phenome Archive	EGAD00001001006
435	65-70	No	No	IIB	7.8	D	Middle	European Genome-phenome Archive	EGAD00001001006
436	75-80	Yes	Yes	IIB	13	D	Lower	European Genome-phenome Archive	EGAD00001001006
437	55-60	Yes	Yes	IIA	27.6	D	Lower	European Genome-phenome Archive	EGAD00001001006
438	40-45	Yes	Yes	IB	74.6	S	Lower	European Genome-phenome Archive	EGAD00001001006
440	50-55	No	Yes	IIIC	11.5	D	Lower	European Genome-phenome Archive	EGAD00001001006
441	80-85	No	Yes	IIIC	1.4	D	Lower	European Genome-phenome Archive	EGAD00001001006
442	55-60	No	No	IIIA	66	S	Middle	European Genome-phenome Archive	EGAD00001001006
443	60-65	No	Yes	IIIC	19.2	D	Lower	European Genome-phenome Archive	EGAD00001001006
444	70-75	Yes	No	IV	4.9	D	Lower	European Genome-phenome Archive	EGAD00001001006
445	60-65	No	No	IIB	62.9	S	Upper	European Genome-phenome Archive	EGAD00001001006
446	50-55	Yes	Yes	IIB	22.1	D	Lower	European Genome-phenome Archive	EGAD00001001006
447	60-65	Yes	Yes	IIIA	21.9	D	Lower	European Genome-phenome Archive	EGAD00001001006
448	55-60	No	No	IIB	56.2	D	Upper	European Genome-phenome Archive	EGAD00001001006
449	55-60	Yes	Yes	IIA	60.2	S	Lower	European Genome-phenome Archive	EGAD00001001006
450	70-75	No	No	IIA	47.2	D	Middle	European Genome-phenome Archive	EGAD00001001006
451	40-45	Yes	Yes	IIIA	12.2	D	Upper	European Genome-phenome Archive	EGAD00001001006
452	60-65	No	Yes	IIIA	15.4	D	Lower	European Genome-phenome Archive	EGAD00001001006
453	65-70	Yes	Yes	IIIA	81.4	S	Middle	European Genome-phenome Archive	EGAD00001001006
454	50-55	Yes	Yes	IIIB	15.9	D	Lower	European Genome-phenome Archive	EGAD00001001006
456	55-60	Yes	Yes	IB	59.1	D	Upper	European Genome-phenome Archive	EGAD00001001006
457	55-60	Yes	Yes	IIIA	10.6	D	Middle	European Genome-phenome Archive	EGAD00001001006
458	45-50	Yes	Yes	IIIC	17.5	D	Middle	European Genome-phenome Archive	EGAD00001001006
459	50-55	Yes	Yes	IIB	72.6	S	Middle	European Genome-phenome Archive	EGAD00001001006
460	45-50	Yes	Yes	IIIA	6.7	D	Lower	European Genome-phenome Archive	EGAD00001001006
461	55-60	No	No	IIB	61.3	S	Middle	European Genome-phenome Archive	EGAD00001001006
462	65-70	No	No	IIIC	21.4	D	Middle	European Genome-phenome Archive	EGAD00001001006
463	55-60	Yes	Yes	IIIA	22.4	D	Lower	European Genome-phenome Archive	EGAD00001001006
464	60-65	Yes	No	IB	9.8	D	Lower	European Genome-phenome Archive	EGAD00001001006
465	50-55	Yes	Yes	IIIC	79.8	S	Lower	European Genome-phenome Archive	EGAD00001001006
466	45-50	Yes	Yes	IB	79.2	S	Lower	European Genome-phenome Archive	EGAD00001001006
467	65-70	Yes	Yes	IIB	0.1	D	Middle	European Genome-phenome Archive	EGAD00001001006
468	55-60	No	No	IIIC	19.3	D	Upper	European Genome-phenome Archive	EGAD00001001006
469	65-70	Yes	Yes	IIIA	14.4	D	Lower	European Genome-phenome Archive	EGAD00001001006
470	50-55	No	Yes	IIIA	76.2	S	Lower	European Genome-phenome Archive	EGAD00001001006
471	40-45	Yes	Yes	IIIA	75.3	S	Lower	European Genome-phenome Archive	EGAD00001001006
472	50-55	Yes	Yes	IIIA	57.7	S	Lower	European Genome-phenome Archive	EGAD00001001006
473	50-55	No	No	IIIB	25.2	D	Middle	European Genome-phenome Archive	EGAD00001001006
474	65-70	No	No	IIIA	5.8	D	Middle	European Genome-phenome Archive	EGAD00001001006
475	65-70	Yes	Yes	IIIA	63.1	D	Lower	European Genome-phenome Archive	EGAD00001001006
476	60-65	No	No	IIIA	25.7	D	Lower	European Genome-phenome Archive	EGAD00001001006
477	65-70	Yes	Yes	IIIA	81.8	S	Lower	European Genome-phenome Archive	EGAD00001001006
478	55-60	Yes	Yes	IIIC	12	D	Lower	European Genome-phenome Archive	EGAD00001001006
479	70-75	No	Yes	IIIA	12.6	D	Lower	European Genome-phenome Archive	EGAD00001001006
480	65-70	Yes	Yes	IIA	58.8	S	Lower	European Genome-phenome Archive	EGAD00001001006
BGI-121	60-65	Yes	NA	IB	NA	NA	Lower	NCBI Sequence Read Archive	SRA112617
BGI-122	60-65	Yes	NA	IB	49	S	Lower	NCBI Sequence Read Archive	SRA112617
BGI-123	70-75	Yes	NA	IB	8	D	Lower	NCBI Sequence Read Archive	SRA112617
BGI-124	60-65	Yes	NA	IB	47	S	Lower	NCBI Sequence Read Archive	SRA112617
BGI-125	70-75	Yes	NA	IB	3	D	Lower	NCBI Sequence Read Archive	SRA112617
BGI-126	55-60	Yes	NA	IB	46	S	Lower	NCBI Sequence Read Archive	SRA112617
BGI-127	60-65	Yes	NA	IB	60	S	Lower	NCBI Sequence Read Archive	SRA112617
BGI-128	55-60	No	NA	IB	49	S	Lower	NCBI Sequence Read Archive	SRA112617
BGI-129	45-50	Yes	NA	IB	44	S	Lower	NCBI Sequence Read Archive	SRA112617
BGI-130	55-60	Yes	NA	IB	43	S	Lower	NCBI Sequence Read Archive	SRA112617
BGI-131	60-65	No	NA	IA	16	D	Middle	NCBI Sequence Read Archive	SRA112617
BGI-132	60-65	Yes	NA	IB	11	D	Lower	NCBI Sequence Read Archive	SRA112617
BGI-133	65-70	Yes	NA	IB	NA	NA	Lower	NCBI Sequence Read Archive	SRA112617
BGI-134	65-70	Yes	NA	IB	43	S	Lower	NCBI Sequence Read Archive	SRA112617
BGI-135	55-60	Yes	NA	IB	34	D	Lower	NCBI Sequence Read Archive	SRA112617
BGI-136	75-80	Yes	NA	IB	21	D	Lower	NCBI Sequence Read Archive	SRA112617
BGI-137	65-70	Yes	NA	IB	NA	NA	Lower	NCBI Sequence Read Archive	SRA112617
BGI-138	45-50	Yes	NA	IB	6	D	Lower	NCBI Sequence Read Archive	SRA112617
BGI-139	50-55	Yes	NA	IA	53	S	Lower	NCBI Sequence Read Archive	SRA112617
BGI-140	55-60	No	NA	IB	52	S	Middle	NCBI Sequence Read Archive	SRA112617
BGI-141	55-60	Yes	NA	IB	55	S	Lower	NCBI Sequence Read Archive	SRA112617
BGI-142	50-55	Yes	NA	IB	15	D	Lower	NCBI Sequence Read Archive	SRA112617
BGI-143	55-60	Yes	NA	IB	NA	NA	Lower	NCBI Sequence Read Archive	SRA112617
BGI-144	60-65	Yes	NA	IB	30	S	Lower	NCBI Sequence Read Archive	SRA112617
BGI-145	65-70	Yes	NA	IB	81	S	Lower	NCBI Sequence Read Archive	SRA112617
BGI-146	60-65	Yes	NA	IB	60	S	Lower	NCBI Sequence Read Archive	SRA112617
BGI-147	60-65	Yes	NA	IB	46	S	Lower	NCBI Sequence Read Archive	SRA112617
BGI-148	40-45	Yes	NA	IA	56	S	Middle	NCBI Sequence Read Archive	SRA112617
BGI-149	65-70	Yes	NA	IB	43	S	Lower	NCBI Sequence Read Archive	SRA112617
BGI-150	55-60	Yes	NA	IB	41	S	Lower	NCBI Sequence Read Archive	SRA112617
BGI-151	40-45	Yes	NA	IB	42	S	Lower	NCBI Sequence Read Archive	SRA112617
BGI-152	45-50	Yes	NA	IB	50	S	Lower	NCBI Sequence Read Archive	SRA112617
BGI-153	55-60	No	NA	IB	NA	NA	Lower	NCBI Sequence Read Archive	SRA112617
BGI-154	70-75	Yes	NA	IB	2	D	Lower	NCBI Sequence Read Archive	SRA112617
BGI-155	65-70	Yes	NA	IB	29	S	Lower	NCBI Sequence Read Archive	SRA112617
BGI-156	65-70	Yes	NA	IB	NA	NA	Lower	NCBI Sequence Read Archive	SRA112617
BGI-157	55-60	Yes	NA	IB	NA	NA	Lower	NCBI Sequence Read Archive	SRA112617
BGI-158	40-45	Yes	NA	IB	11	D	Lower	NCBI Sequence Read Archive	SRA112617
BGI-159	60-65	Yes	NA	IB	53	S	Lower	NCBI Sequence Read Archive	SRA112617
BGI-160	70-75	Yes	NA	IB	51	S	Lower	NCBI Sequence Read Archive	SRA112617
BGI-161	60-65	Yes	NA	IB	NA	NA	Lower	NCBI Sequence Read Archive	SRA112617
BGI-162	55-60	No	NA	IB	6	D	Lower	NCBI Sequence Read Archive	SRA112617
BGI-163	50-55	Yes	NA	IB	28	S	Lower	NCBI Sequence Read Archive	SRA112617
BGI-164	60-65	Yes	NA	IB	58	S	Lower	NCBI Sequence Read Archive	SRA112617
BGI-165	55-60	Yes	NA	IB	NA	NA	Lower	NCBI Sequence Read Archive	SRA112617
BGI-166	60-65	Yes	NA	IB	NA	NA	Lower	NCBI Sequence Read Archive	SRA112617
BGI-321	55-60	No	NA	IIIB	19	D	Middle	NCBI Sequence Read Archive	SRA112617
BGI-322	60-65	Yes	NA	IIIB	12	D	Lower	NCBI Sequence Read Archive	SRA112617
BGI-323	70-75	Yes	NA	IIIB	8	D	Middle	NCBI Sequence Read Archive	SRA112617
BGI-324	50-55	Yes	NA	IIIC	NA	NA	Middle	NCBI Sequence Read Archive	SRA112617
BGI-325	55-60	Yes	NA	IIIA	NA	NA	Middle	NCBI Sequence Read Archive	SRA112617
BGI-326	50-55	Yes	NA	IIIC	23	D	Middle	NCBI Sequence Read Archive	SRA112617
BGI-327	45-50	Yes	NA	IIIB	45	S	Middle	NCBI Sequence Read Archive	SRA112617
BGI-328	55-60	Yes	NA	IIIA	NA	NA	Upper	NCBI Sequence Read Archive	SRA112617
BGI-329	45-50	Yes	NA	IIIA	11	D	Middle	NCBI Sequence Read Archive	SRA112617
BGI-330	50-55	Yes	NA	IIIB	23	D	Middle	NCBI Sequence Read Archive	SRA112617
BGI-331	40-45	Yes	NA	IIIB	NA	NA	Middle	NCBI Sequence Read Archive	SRA112617
BGI-332	55-60	Yes	NA	IIIB	54	S	Middle	NCBI Sequence Read Archive	SRA112617
BGI-333	65-70	Yes	NA	IIIA	86	S	Lower	NCBI Sequence Read Archive	SRA112617
BGI-334	70-75	Yes	NA	IIIB	6	D	Middle	NCBI Sequence Read Archive	SRA112617
BGI-335	55-60	Yes	NA	IIIA	51	S	Middle	NCBI Sequence Read Archive	SRA112617
BGI-336	55-60	Yes	NA	IIIA	NA	NA	Middle	NCBI Sequence Read Archive	SRA112617
BGI-337	55-60	Yes	NA	IIIB	NA	NA	Middle	NCBI Sequence Read Archive	SRA112617
BGI-338	55-60	Yes	NA	IIIB	15	D	Middle	NCBI Sequence Read Archive	SRA112617
BGI-339	60-65	Yes	NA	IIIB	23	D	Middle	NCBI Sequence Read Archive	SRA112617
BGI-340	65-70	Yes	NA	IIIA	26	D	Middle	NCBI Sequence Read Archive	SRA112617
BGI-341	70-75	Yes	NA	IIIB	NA	NA	Upper	NCBI Sequence Read Archive	SRA112617
BGI-342	55-60	Yes	NA	IIIA	19	D	Middle	NCBI Sequence Read Archive	SRA112617
BGI-343	55-60	Yes	NA	IIIB	50	D	Lower	NCBI Sequence Read Archive	SRA112617
BGI-344	50-55	Yes	NA	IIIA	42	D	Middle	NCBI Sequence Read Archive	SRA112617
BGI-345	45-50	Yes	NA	IIIA	26	D	Middle	NCBI Sequence Read Archive	SRA112617
BGI-346	60-65	Yes	NA	IIIC	16	D	Middle	NCBI Sequence Read Archive	SRA112617
BGI-347	40-45	Yes	NA	IIIA	28	D	Middle	NCBI Sequence Read Archive	SRA112617
BGI-348	40-45	No	NA	IIIC	55	S	Lower	NCBI Sequence Read Archive	SRA112617
BGI-349	50-55	Yes	NA	IIIA	37	S	Middle	NCBI Sequence Read Archive	SRA112617
BGI-350	60-65	Yes	NA	IIIA	NA	NA	Middle	NCBI Sequence Read Archive	SRA112617
BGI-351	50-55	Yes	NA	IIIA	34	D	Lower	NCBI Sequence Read Archive	SRA112617
BGI-352	70-75	Yes	NA	IIIA	33	S	Middle	NCBI Sequence Read Archive	SRA112617
BGI-353	70-75	Yes	NA	IIIB	20	D	Middle	NCBI Sequence Read Archive	SRA112617
BGI-354	55-60	Yes	NA	IIIA	NA	NA	Middle	NCBI Sequence Read Archive	SRA112617
BGI-355	60-65	Yes	NA	IIIA	30	S	Middle	NCBI Sequence Read Archive	SRA112617
BGI-356	55-60	Yes	NA	IIIA	21	S	Middle	NCBI Sequence Read Archive	SRA112617
BGI-357	65-70	Yes	NA	IIIA	27	S	Lower	NCBI Sequence Read Archive	SRA112617
BGI-358	50-55	Yes	NA	IIIA	29	S	Middle	NCBI Sequence Read Archive	SRA112617
BGI-359	55-60	Yes	NA	IIIC	28	S	Middle	NCBI Sequence Read Archive	SRA112617
BGI-360	45-50	Yes	NA	IIIA	NA	NA	Middle	NCBI Sequence Read Archive	SRA112617
BGI-361	60-65	No	NA	IIIB	30	D	Lower	NCBI Sequence Read Archive	SRA112617
BGI-362	NA	Yes	NA	IIIB	24	D	Middle	NCBI Sequence Read Archive	SRA112617
BGI-363	50-55	Yes	NA	IIIA	25	D	Middle	NCBI Sequence Read Archive	SRA112617
BGI-364	55-60	Yes	NA	IIIB	NA	NA	Middle	NCBI Sequence Read Archive	SRA112617
ESCC-038	70-75	Yes	No	IIA	8.4	D	NA	European Genome-phenome Archive	EGAD00001000760
ESCC-039	45-50	Yes	No	IIB	33.6	S	NA	European Genome-phenome Archive	EGAD00001000760
ESCC-055	60-65	Yes	Yes	IIA	50	S	NA	European Genome-phenome Archive	EGAD00001000760
ESCC-057	55-60	Yes	No	IIIB	23.1	D	NA	European Genome-phenome Archive	EGAD00001000760
ESCC-059	45-50	Yes	Yes	IIIC	9	D	NA	European Genome-phenome Archive	EGAD00001000760
ESCC-060	55-60	Yes	No	IIIC	25	D	NA	European Genome-phenome Archive	EGAD00001000760
ESCC-069	55-60	Yes	Yes	IIIA	45.8	S	NA	European Genome-phenome Archive	EGAD00001000760
ESCC-070	65-70	Yes	Yes	IIIA	40.5	D	NA	European Genome-phenome Archive	EGAD00001000760
ESCC-078	50-55	Yes	No	IIA	48.4	S	NA	European Genome-phenome Archive	EGAD00001000760
ESCC-083	65-70	No	No	IIIA	47.4	D	NA	European Genome-phenome Archive	EGAD00001000760
ESCC-092	85-90	No	No	IIA	47.7	S	NA	European Genome-phenome Archive	EGAD00001000760
ESCC-098	70-75	Yes	Yes	IIB	47.2	S	NA	European Genome-phenome Archive	EGAD00001000760
ESCC-100	65-70	No	No	IIIA	47	S	NA	European Genome-phenome Archive	EGAD00001000760
ESCC-107	55-60	No	No	IIA	46.7	S	NA	European Genome-phenome Archive	EGAD00001000760
ESCC-110	60-65	Yes	No	IIIB	10.1	D	NA	European Genome-phenome Archive	EGAD00001000760
ESCC-112	65-70	Yes	No	IIIA	32.7	D	NA	European Genome-phenome Archive	EGAD00001000760
ESCC-116	70-75	Yes	No	IIB	28.8	D	NA	European Genome-phenome Archive	EGAD00001000760
ESCC-123	55-60	Yes	No	IIA	45.3	S	NA	European Genome-phenome Archive	EGAD00001000760
ESCC-127	45-50	Yes	Yes	IIB	15.4	D	NA	European Genome-phenome Archive	EGAD00001000760
ESCC-128	50-55	Yes	Yes	IIB	44.9	S	NA	European Genome-phenome Archive	EGAD00001000760
ESCC-129	55-60	Yes	Yes	IIIA	18.8	D	NA	European Genome-phenome Archive	EGAD00001000760
ESCC-133	55-60	Yes	No	IIA	44.5	S	NA	European Genome-phenome Archive	EGAD00001000760
ESCC-134	65-70	Yes	No	IIIB	26	D	NA	European Genome-phenome Archive	EGAD00001000760
ESCC-139	60-65	Yes	No	IIIA	44	S	NA	European Genome-phenome Archive	EGAD00001000760
ESCC-141	50-55	Yes	Yes	IIIA	19.7	D	NA	European Genome-phenome Archive	EGAD00001000760
ESCC-144	50-55	No	No	IB	43.2	S	NA	European Genome-phenome Archive	EGAD00001000760
ESCC-147	55-60	Yes	Yes	IIB	17.5	D	NA	European Genome-phenome Archive	EGAD00001000760
ESCC-148	65-70	No	No	IIIA	4.9	D	NA	European Genome-phenome Archive	EGAD00001000760
ESCC-152	60-65	Yes	No	IIA	21.1	D	NA	European Genome-phenome Archive	EGAD00001000760
ESCC-153	45-50	Yes	No	IIA	42.1	S	NA	European Genome-phenome Archive	EGAD00001000760
ESCC-154	55-60	Yes	No	IIB	13.5	D	NA	European Genome-phenome Archive	EGAD00001000760
ESCC-155	65-70	Yes	No	IIB	41.9	S	NA	European Genome-phenome Archive	EGAD00001000760
ESCC-158	50-55	No	No	IIB	41.2	S	NA	European Genome-phenome Archive	EGAD00001000760
ESCC-159	45-50	No	No	IIB	41.2	S	NA	European Genome-phenome Archive	EGAD00001000760
ESCC-162	55-60	Yes	No	IIIB	6.4	D	NA	European Genome-phenome Archive	EGAD00001000760
ESCC-164	40-45	Yes	No	IIIA	15	D	NA	European Genome-phenome Archive	EGAD00001000760
ESCC-171	50-55	No	No	IB	40.2	S	NA	European Genome-phenome Archive	EGAD00001000760
ESCC-175	55-60	No	No	IIB	18.3	D	NA	European Genome-phenome Archive	EGAD00001000760
ESCC-178	60-65	Yes	No	IIIA	39.6	S	NA	European Genome-phenome Archive	EGAD00001000760
ESCC-180	60-65	Yes	Yes	IIA	6.9	D	NA	European Genome-phenome Archive	EGAD00001000760
ESCC-183	60-65	No	No	IIIA	39.1	S	NA	European Genome-phenome Archive	EGAD00001000760
ESCC-184	55-60	No	No	IIIA	24.8	D	NA	European Genome-phenome Archive	EGAD00001000760
ESCC-185	50-55	Yes	No	IIA	38.5	S	NA	European Genome-phenome Archive	EGAD00001000760
ESCC-190	55-60	Yes	Yes	IIIC	20.1	D	NA	European Genome-phenome Archive	EGAD00001000760
ESCC-191	55-60	Yes	No	IB	23.4	S	NA	European Genome-phenome Archive	EGAD00001000760
ESCC-193	60-65	Yes	No	IIB	38.2	S	NA	European Genome-phenome Archive	EGAD00001000760
ESCC-201	50-55	Yes	Yes	IIIA	28.6	S	NA	European Genome-phenome Archive	EGAD00001000760
ESCC-204	65-70	Yes	No	IIIA	10.5	D	NA	European Genome-phenome Archive	EGAD00001000760
ESCC-205	70-75	Yes	No	IIA	37	S	NA	European Genome-phenome Archive	EGAD00001000760
ESCC-207	50-55	No	No	IIA	37	S	NA	European Genome-phenome Archive	EGAD00001000760
ESCC-209	65-70	Yes	No	IIIB	30.2	S	NA	European Genome-phenome Archive	EGAD00001000760
ESCC-210	40-45	No	No	IIIC	26.5	D	NA	European Genome-phenome Archive	EGAD00001000760
ESCC-211	55-60	No	No	IIB	23	D	NA	European Genome-phenome Archive	EGAD00001000760
ESCC-212	45-50	No	No	IIA	36.8	S	NA	European Genome-phenome Archive	EGAD00001000760
ESCC-214	70-75	Yes	No	IIIA	23.7	S	NA	European Genome-phenome Archive	EGAD00001000760
ESCC-216	55-60	Yes	No	IIIC	7.8	D	NA	European Genome-phenome Archive	EGAD00001000760
ESCC-219	55-60	Yes	No	IIIB	18.8	D	NA	European Genome-phenome Archive	EGAD00001000760
ESCC-225	55-60	Yes	Yes	IIIA	24.1	D	NA	European Genome-phenome Archive	EGAD00001000760
ESCC-229	55-60	No	No	IIB	35.6	S	NA	European Genome-phenome Archive	EGAD00001000760
ESCC-230	55-60	No	No	IB	35.5	S	NA	European Genome-phenome Archive	EGAD00001000760
ESCC-231	55-60	No	No	IIIA	35.5	S	NA	European Genome-phenome Archive	EGAD00001000760
ESCC-233	55-60	No	No	IIB	35.3	S	NA	European Genome-phenome Archive	EGAD00001000760
ESCC-235	55-60	No	No	IIIB	27.8	D	NA	European Genome-phenome Archive	EGAD00001000760
ESCC-237	55-60	No	No	IIB	35	S	NA	European Genome-phenome Archive	EGAD00001000760
ESCC-240	65-70	Yes	No	IIB	32.8	D	NA	European Genome-phenome Archive	EGAD00001000760
ESCC-242	40-45	Yes	No	IIB	34.6	S	NA	European Genome-phenome Archive	EGAD00001000760
ESCC-243	65-70	No	No	IIA	7	S	NA	European Genome-phenome Archive	EGAD00001000760
ESCC-246	55-60	Yes	Yes	IIB	1.7	D	NA	European Genome-phenome Archive	EGAD00001000760
ESCC-248	55-60	Yes	No	IIIB	19.7	D	NA	European Genome-phenome Archive	EGAD00001000760
ESCC-249	50-55	No	No	IIB	8.7	D	NA	European Genome-phenome Archive	EGAD00001000760
ESCC-250	55-60	Yes	No	IIB	23.4	D	NA	European Genome-phenome Archive	EGAD00001000760
ESCC-D1	65-70	NA	NA	IIB	NA	NA	NA	NCBI Sequence Read Archive	SRP033394
ESCC-D10	60-65	NA	NA	IIIA	NA	NA	NA	NCBI Sequence Read Archive	SRP033394
ESCC-D11	65-70	NA	NA	IIIA	NA	NA	NA	NCBI Sequence Read Archive	SRP033394
ESCC-D12	55-60	NA	NA	IIB	NA	NA	NA	NCBI Sequence Read Archive	SRP033394
ESCC-D13	45-50	NA	NA	IIIA	NA	NA	NA	NCBI Sequence Read Archive	SRP033394
ESCC-D14	55-60	NA	NA	IIA	NA	NA	NA	NCBI Sequence Read Archive	SRP033394
ESCC-D15	75-80	NA	NA	IB	NA	NA	NA	NCBI Sequence Read Archive	SRP033394
ESCC-D16	50-55	NA	NA	IIIA	NA	NA	NA	NCBI Sequence Read Archive	SRP033394
ESCC-D17	40-45	NA	NA	IIA	NA	NA	NA	NCBI Sequence Read Archive	SRP033394
ESCC-D18	NA	NA	NA	IIIA	NA	NA	NA	NCBI Sequence Read Archive	SRP033394
ESCC-D19	45-50	NA	NA	IIIA	NA	NA	NA	NCBI Sequence Read Archive	SRP033394
ESCC-D2	65-70	NA	NA	IB	NA	NA	NA	NCBI Sequence Read Archive	SRP033394
ESCC-D20	65-70	NA	NA	IB	NA	NA	NA	NCBI Sequence Read Archive	SRP033394
ESCC-D3	65-70	NA	NA	IIA	NA	NA	NA	NCBI Sequence Read Archive	SRP033394
ESCC-D4	60-65	NA	NA	IIA	NA	NA	NA	NCBI Sequence Read Archive	SRP033394
ESCC-D5	45-50	NA	NA	IB	NA	NA	NA	NCBI Sequence Read Archive	SRP033394
ESCC-D7	NA	NA	NA	IIA	NA	NA	NA	NCBI Sequence Read Archive	SRP033394
ESCC-D8	65-70	NA	NA	IIIA	NA	NA	NA	NCBI Sequence Read Archive	SRP033394
ESCC-D9	30-35	NA	NA	IIIA	NA	NA	NA	NCBI Sequence Read Archive	SRP033394
ZH12	70-75	NA	No	IIB	NA	NA	Middle	Zhongshan hospital
ZH16	55-60	NA	No	IIB	NA	NA	Middle	Zhongshan hospital
ZH17	55-60	NA	No	IIB	NA	NA	Middle	Zhongshan hospital
ZH19	50-55	NA	Yes	IIB	NA	NA	Upper	Zhongshan hospital
ZH22	55-60	NA	Yes	IIB	NA	NA	Middle	Zhongshan hospital
ZH23	75-80	NA	No	IIB	NA	NA	Upper	Zhongshan hospital
ZH24	40-45	NA	Yes	IIB	NA	NA	Middle	Zhongshan hospital
ZH25	55-60	NA	No	IIB	NA	NA	Middle	Zhongshan hospital
ZH26	45-50	NA	No	IIB	NA	NA	Middle	Zhongshan hospital
